# Supplementary material
Source: publisher site journal article supplement (http://static.cambridge.org/content/id/urn:cambridge.org:id:article:S0022112016006637/resource/name/FLM1600663supp.zip)
Supplement: Supplementary file 1 [file FLM1600663supp.zip]

# Supplementary material for “Quantifying acoustic damping using flame chemiluminescence”

**E. Boujo<sup>1†</sup>, A. Denisov<sup>2</sup>, B. Schuermans<sup>3</sup> and N. Noiray<sup>1</sup>**

<sup>1</sup>CAPS Lab., Mechanical and Process Engineering Dept., ETHZ, 8092 Zürich, Switzerland

<sup>2</sup>Combustion Research Lab., Paul Scherrer Institute, 5232 Villigen, Switzerland

<sup>3</sup>GE Power, 5401 Baden, Switzerland

(Received xx; revised xx; accepted xx)

† Email address for correspondence: eboujo@ethz.ch

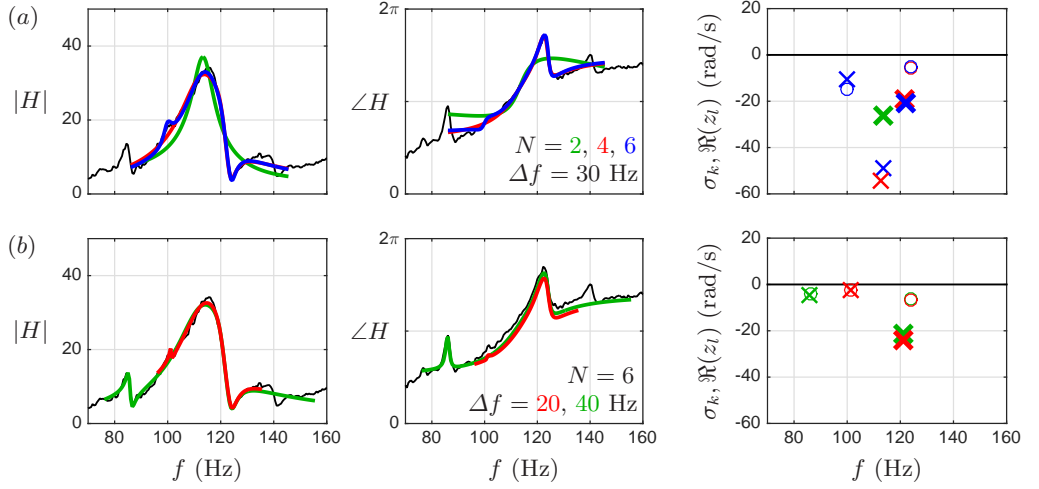

FIGURE 1. Simultaneous fit of the gain and phase of the acoustic transfer function  $H(f)$ , and corresponding poles ( $\times$ ) and zeros ( $\bullet$ ) for different orders  $N$  and frequency ranges  $f_p \pm \Delta f$ : (a)  $N = 2, 4$  and  $6$ ,  $\Delta f = 30$  Hz; (b)  $N = 6$ ,  $\Delta f = 20$  and  $40$  Hz. Bold crosses indicate the dominant pole  $\lambda_a$  in the vicinity of the peak frequency  $f_p$ . Equivalence ratio  $\Phi = 0.538$ .

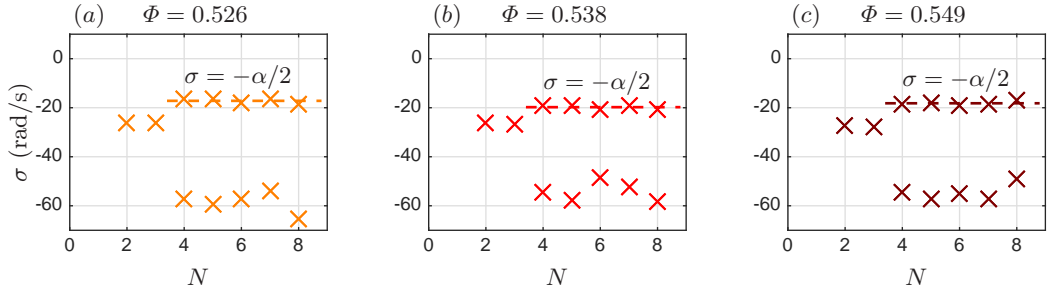

FIGURE 2. Real part of the poles identified in the vicinity of the peak frequency  $f_p$ , vs. order  $N$  of the fitting transfer function. (a)  $\Phi = 0.526$ , (b)  $\Phi = 0.538$ , (c)  $\Phi = 0.549$ . Dashed lines show the real part  $\sigma$  of the identified dominant pole.
